# Supplementary material
Source: publisher site journal article supplement (https://www.dovepress.com/get_supplementary_file.php?f=209756.docx)
Supplement: Supplementary file 1 [file get_supplementary_file.php]

# Supplementary data for:

# Enhanced antibiotic activity of Ampicillin conjugated to gold nanoparticles on PEGylated rosette nanotubes

Yiwen Fan,1 Alexander C. Pauer,1 Arthur A. Gonzales,1 Hicham Fenniri1-3,*

1Department of Chemical Engineering, Northeastern University, Boston, MA 02115, USA

2Department of Bioengineering, Northeastern University, Boston, MA 02115, USA

3Department of Chemistry and Chemical Biology, Northeastern University, Boston, MA 02115, USA


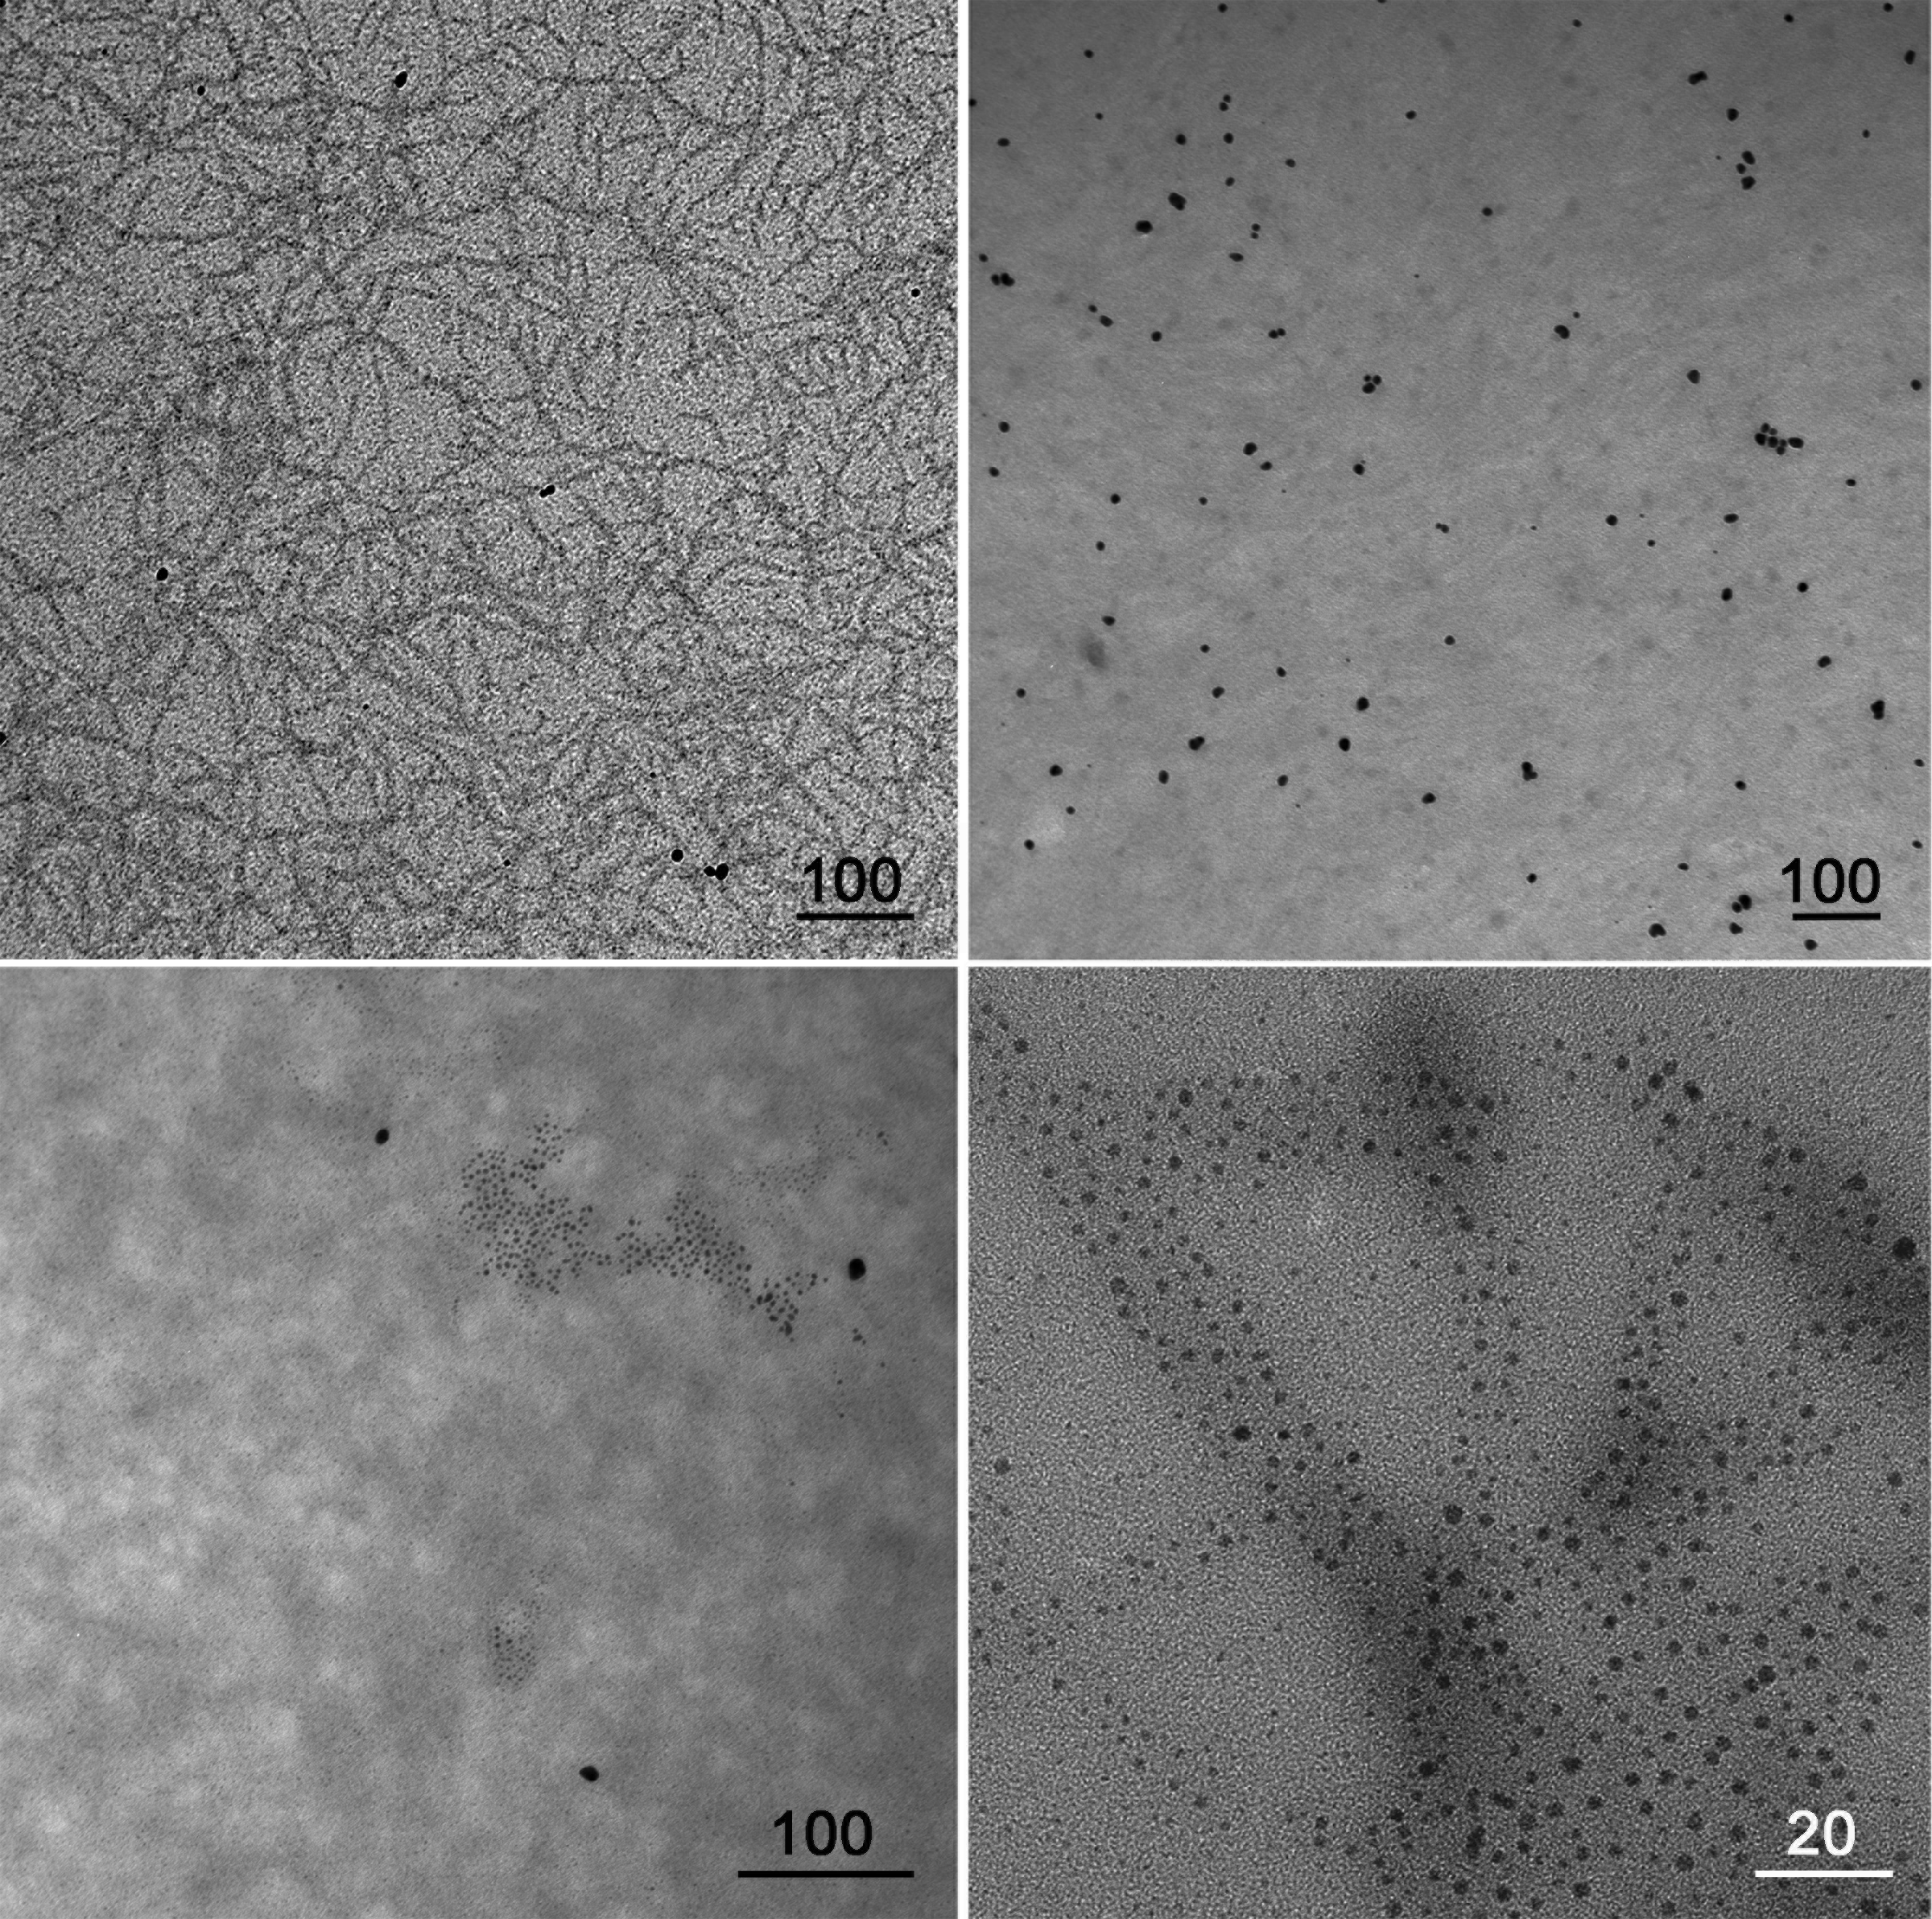


**Figure S1** TEM images in samples (A) Au-PEG-RNT-1, (B) Au-PEG-RNT-2, (C) Au-PEG-RNT-3, and (D) Au-PEG-RNT-4. Scale bar in nm.


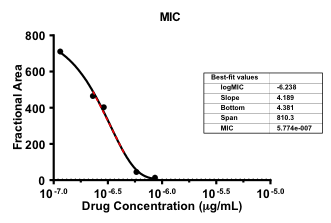

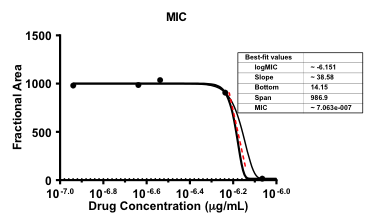


**Figure S2** MIC fitting graph for Amp-AuNPs-PEG-RNT against *S. aureus* (left), and MIC fitting graph for ampicillin against *S. aureus* (right).


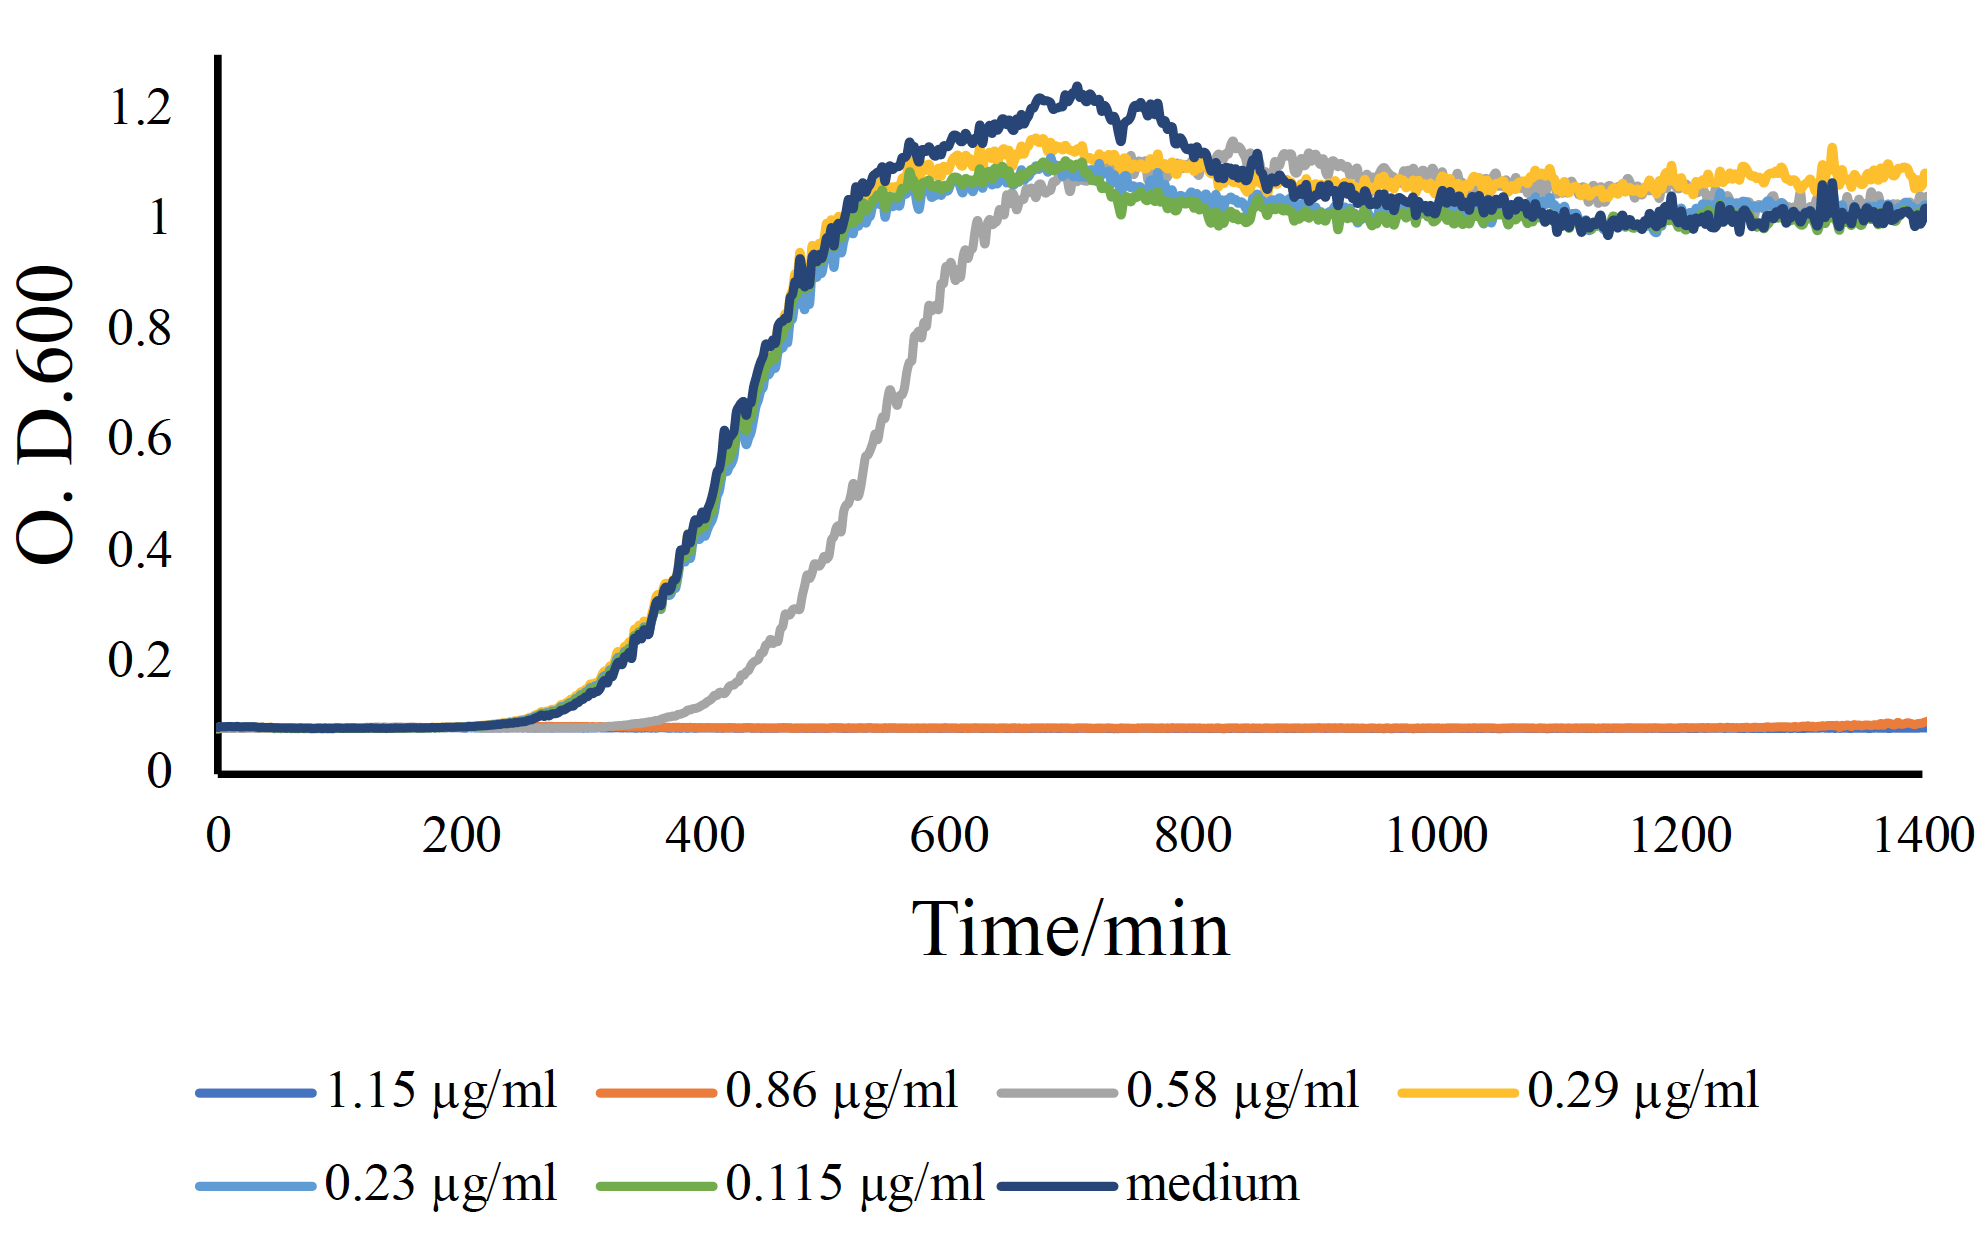


**Figure S3.** Bacterial growth inhibition graph for S. aureus up to 24h in the presence of ampicillin at concentrations: 1.15 μg/mL, 0.86 μg/mL, 0.58 μg/mL, 0.29 μg/mL, 0.23 μg/mL, and 0.115 μg/mL. Negative control groups received medium alone. N = 3.
